# Supplementary material for: Long Bone Defect Filling with Bioactive Degradable 3D-Implant: Experimental Study
Source: MDPI journal article supplement (doi:10.3390/biomimetics8020138), 2023-03-28
Supplement: s1 [file s1]

# Supporting Information of: Long bone defect filling with bioactive degradable 3D-implant: experimental study

Arnold Popkov <sup>1</sup>, Natalia Kononovich <sup>1</sup>, Gleb Dubinenko <sup>2</sup>, Elena Gorbach <sup>1</sup>, Alexander Shastov <sup>1</sup>, Sergei Tverdokhlebov <sup>2</sup> and Dmitry Popkov <sup>1,\*</sup>

<sup>1</sup> Ilizarov National Medical Research Center for Traumatology and Orthopedics, Kurgan 640014, Russia; popkov72@gmail.com (A.P.); n.a.kononovich@mail.ru (N.K.); gorbach.e@mail.ru (E.G.); alshastov@yandex.ru (A.S.)

<sup>2</sup> School of Nuclear Science & Engineering, National Research Tomsk Polytechnic University, Tomsk 634050, Russia; dubinenko.gleb@gmail.com (G.D.); tverd@tpu.ru (S.T.)

\* Correspondence: dpopkov@mail.ru

## Supplementary Materials and Methods

**EDX analysis:** Chemical composition of the HA coated implants was studied by energy-dispersive X-ray analysis (EDX) on JEOL JCM-6000 scanning electron microscope (JEOL USA, USA) equipped with energy dispersive X-ray spectrometer JED-2300 Analysis Station Plus. The presence of the Ag in EDX spectra is due to the sputter coating of the surface of samples before SEM and EDX with gold to provide electro conductive layer.

**FTIR analysis:** The chemical composition of the implants was investigated by attenuated total reflectance (ATR) Fourier-transform infrared spectroscopy (FTIR) on Tensor 27 (Bruker Optik GmbH, Ettlingen, Germany) with a Miracle™ single reflection ATR attachment (PIKE Technologies, Madison, Wisconsin, USA). The measurements were performed with a ZnSe crystal at an incident angle of 45°. All FTIR spectra were recorded in the spectral range of 530 – 4000  $\text{cm}^{-1}$  with a resolution of 4  $\text{cm}^{-1}$ .

## Supporting Figures

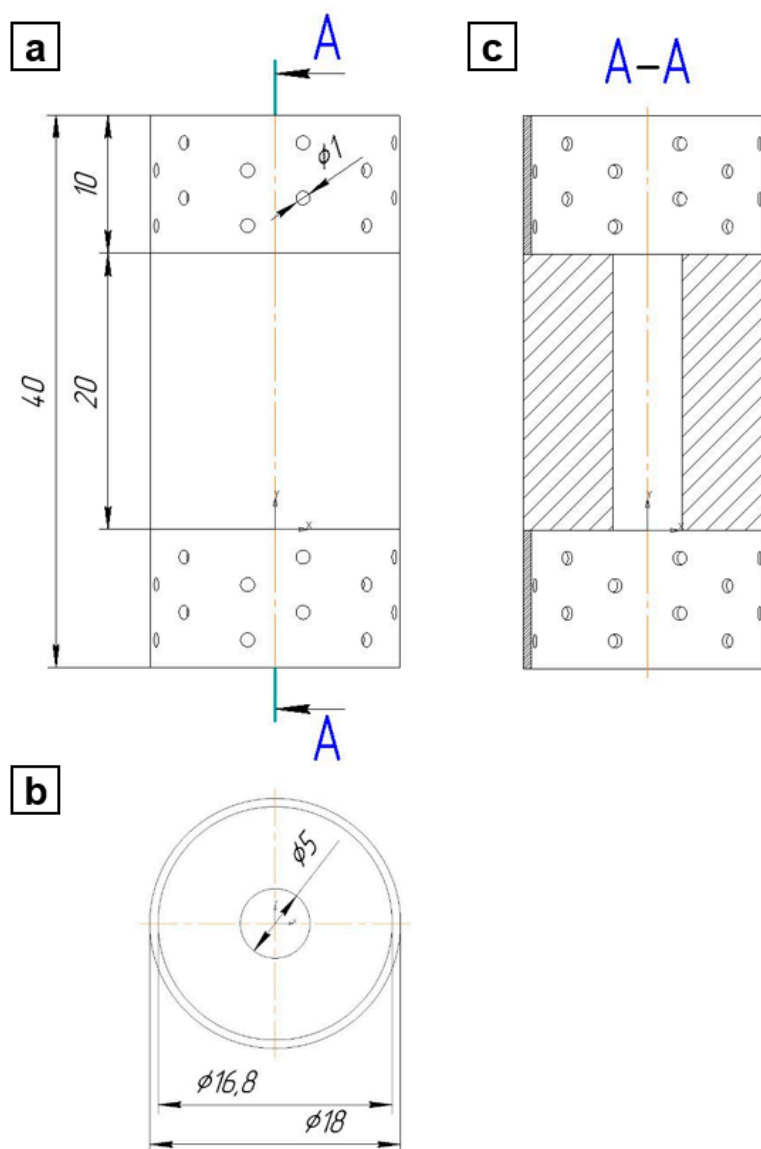

**Figure S1.** Drawing of the implant: a – front view, b – top view, c – A-A section.

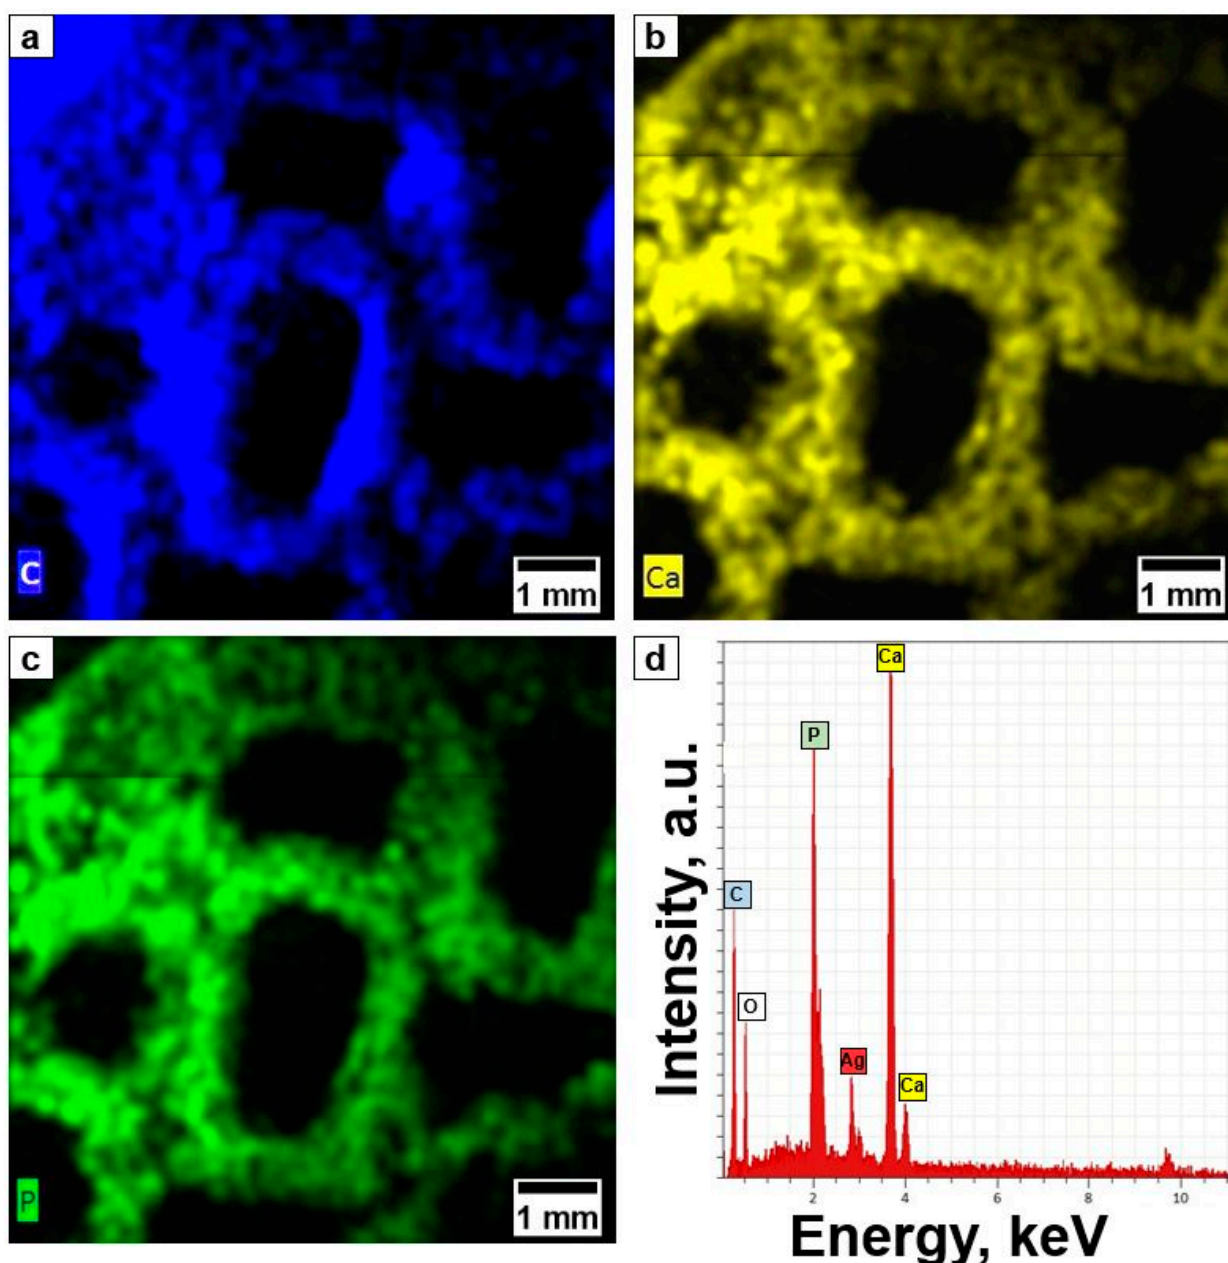

**Figure S2.** EDX elemental mapping of the HA coated implants: a – carbon (C), b – calcium (Ca), c – phosphorus (P), d – EDX spectra.

FTIR spectra of the scaffolds are shown in Figure S3. The PCL pellets and 3D-printed implant are characterized by the following main bands:  $2945\text{ cm}^{-1}$  ( $\nu_{\text{as}}\text{CH}_2$ ),  $2868\text{ cm}^{-1}$  ( $\nu_{\text{s}}\text{CH}_2$ ),  $1724\text{ cm}^{-1}$  ( $\nu\text{C=O}$ ),  $1294\text{ cm}^{-1}$  ( $\nu_{\text{s}}\text{C-O}$ ,  $\nu_{\text{s}}\text{C-C}$ ),  $1240\text{ cm}^{-1}$  ( $\nu_{\text{as}}\text{C-O-C}$ ) and  $1168\text{ cm}^{-1}$  ( $\nu_{\text{s}}\text{C-O-C}$ ). In the HA coated implant spectrum, there are also HA-related bands at  $1042\text{ cm}^{-1}$  ( $\nu\text{PO}$ ),  $958\text{ cm}^{-1}$  ( $\delta\text{PO}$ ),  $730\text{ cm}^{-1}$  ( $\delta\text{PO}$ ), and  $706\text{ cm}^{-1}$  ( $\delta\text{PO}$ ) present. There are no significant differences in the shape, width and wavenumber position of PCL bands both in spectrum of the 3D-printed and coated scaffolds. It is important to note that the presence of hydrophilic HA on the surface of the scaffold increases the oxidative reaction of PCL and introduces hydroxyl groups into the polymer backbone. However, there is no evidence for active oxidative degradation of the PCL scaffolds, which is usually indicated by a broadening of the carbonyl peak of the ester groups of polyesters at  $1724\text{ cm}^{-1}$ .

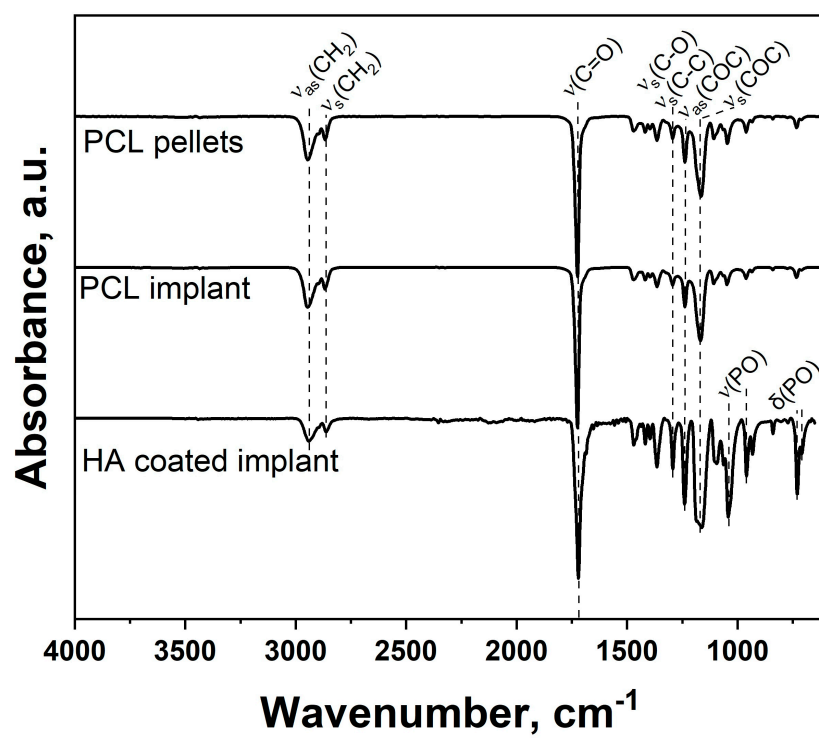

**Figure S3.** Chemical characterization of the implants by FTIR.
